# Supplementary material
Source: PubMed Central journal article supplement (PMC2856247)

## SUPPLEMENTAL DATA

# Crosstalk between Mitochondrial Malate Dehydrogenase and Cytochrome *bc*<sub>1</sub> Complex

Qiyu Wang, Linda Yu and Chang-An Yu

FIGURE S1. Lineweaver Burk plots for the MDH reverse directional activity by the change of NADH. 0.1mM, 0.05mM, 0.025mM, 0.016mM, 0.0125mM of NADH and 0.2 mM OAA were used in the assay for analyzing the  $K_m$  of NADH. All values (presented in Table III of main text) are averages from three independent experiments.

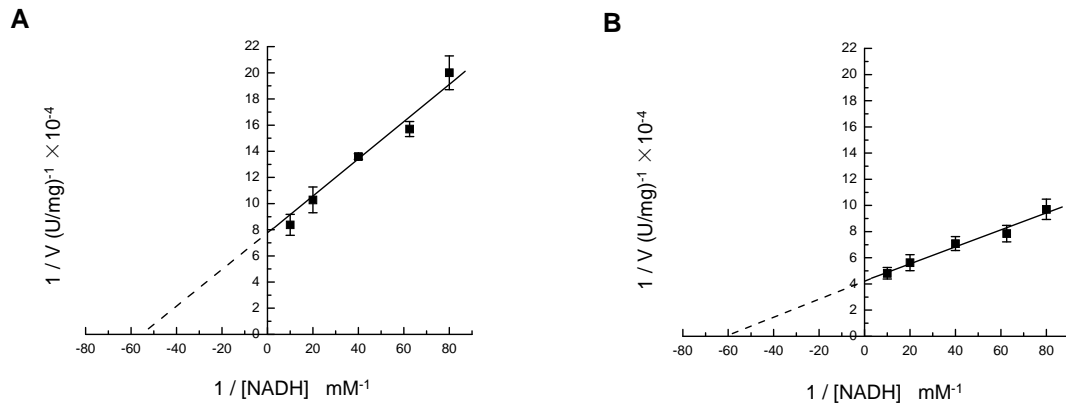

FIGURE S2. Lineweaver Burk plots for the MDH reverse directional activity by the change of OAA. 0.1mM, 0.025mM, 0.0125mM, 0.00625mM of OAA and 0.2 mM NADH were used in the assay for analyzing the  $K_m$  of OAA. All values (presented in Table III of main text) are averages from three independent experiments.

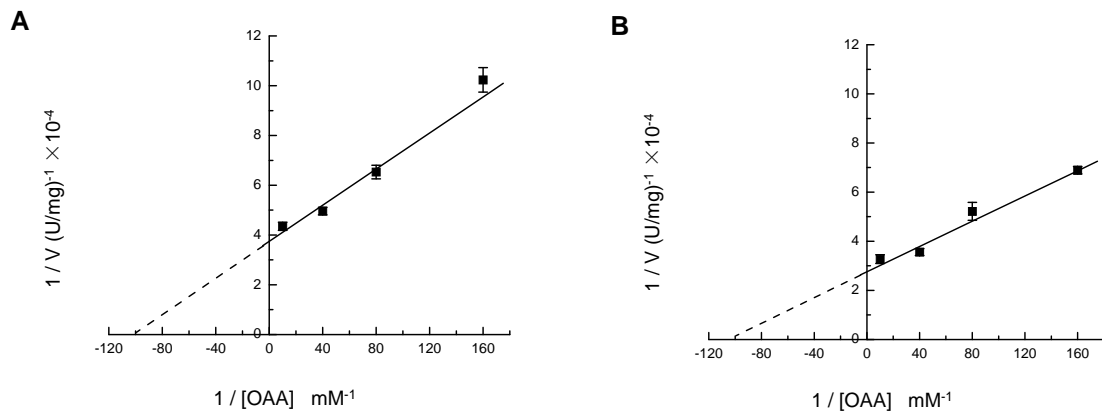

Supplement: supp_M109.085787_Supplemental_Data.pdf [file supp_M109.085787_Supplemental_Data.pdf]
